# Supplementary material
Source: PubMed Central journal article supplement (PMC6137545)
Supplement: fj.201500142.st1.pdf [file fj.201500142.st1.pdf]

**Tab S1.** Rats exposed prenatally and continuously for 3 weeks to unfiltered Beijing air vs. those exposed to filtered Beijing air. (a) Body and organ mass. (b) Blood biomarkers (males only). LDL: low-density lipoprotein, HDL: high-density lipoprotein, TG: triglyceride, TC: total cholesterol, MDA: malondialdehyde, GSH: glutathione, GPL-1: glucagon-like pepti-1.

| <b>a. Body and organ mass (g)</b> |               |       |            |       |         | <b>b. Biomarker</b> |        |            |        |         |                      |      |      |      |      |       |
|-----------------------------------|---------------|-------|------------|-------|---------|---------------------|--------|------------|--------|---------|----------------------|------|------|------|------|-------|
|                                   | <b>Female</b> |       |            |       |         | <b>Male</b>         |        |            |        |         |                      |      |      |      |      |       |
|                                   | Filtered      |       | Unfiltered |       | P-value | Filtered            |        | Unfiltered |        | P-value |                      |      |      |      |      |       |
|                                   | (n=8)         | (n=6) | (n=8)      | (n=6) |         | (n=10)              | (n=10) | (n=10)     | (n=10) |         |                      |      |      |      |      |       |
| Mean                              | SD            | Mean  | SD         | Mean  | SD      | Mean                | SD     | Mean       | SD     | P-value |                      |      |      |      |      |       |
| <b>Body</b>                       | 45.2          | 5.40  | 48.8       | 8.98  | 0.411   | 45.5                | 5.49   | 50.5       | 9.34   | 0.283   | <b>LDL(μmol/L)</b>   | 56.1 | 9.24 | 49.6 | 5.65 | 0.074 |
| <b>Liver</b>                      | 1.78          | 0.23  | 1.98       | 0.43  | 0.337   | 1.81                | 0.47   | 1.99       | 0.51   | 0.529   | <b>HDL(μmol/L)</b>   | 46.5 | 1.07 | 49.1 | 2.20 | 0.006 |
| <b>Spleen</b>                     | 0.19          | 0.05  | 0.23       | 0.07  | 0.277   | 0.17                | 0.03   | 0.23       | 0.07   | 0.161   | <b>TG(mmol/L)</b>    | 2.87 | 1.93 | 2.06 | 1.23 | 0.282 |
| <b>Adrenal</b>                    | 0.01          | 0.00  | 0.02       | 0.01  | 0.322   | 0.01                | 0.0    | 0.02       | 0.0    | 0.081   | <b>TC(mmol/L)</b>    | 26.8 | 2.00 | 25.9 | 1.94 | 0.325 |
| <b>Thymus</b>                     | 0.17          | 0.05  | 0.18       | 0.03  | 0.615   | 0.16                | 0.04   | 0.19       | 0.05   | 0.241   | <b>MDA(nmol/L)</b>   | 15.2 | 8.32 | 10.5 | 5.26 | 0.148 |
| <b>Heart</b>                      | 0.23          | 0.03  | 0.25       | 0.06  | 0.481   | 0.22                | 0.03   | 0.25       | 0.06   | 0.408   | <b>GSH(ng/mL)</b>    | 2.28 | 1.79 | 2.86 | 2.21 | 0.525 |
| <b>Brain</b>                      | 1.34          | 0.10  | 1.38       | 0.05  | 0.316   | 1.35                | 0.05   | 1.4        | 0.06   | 0.108   | <b>GPL-1(pmol/L)</b> | 10.3 | 7.94 | 16.3 | 13.2 | 0.234 |
| <b>Lung</b>                       | 0.38          | 0.04  | 0.37       | 0.05  | 0.848   | 0.39                | 0.05   | 0.41       | 0.1    | 0.703   |                      |      |      |      |      |       |

**Tab S2.** Primers selected for real-time PCR analyses, based on significantly up or down regulated genes following exposure to the unfiltered air compared to exposure to the filtered air.

| <b>Primer</b>    | <b>Forward</b>           | <b>Reverse</b>           | <b>Primer</b>   | <b>Forward</b>        | <b>Reverse</b>          |
|------------------|--------------------------|--------------------------|-----------------|-----------------------|-------------------------|
| <b>Myh7</b>      | TCAGTCATGGCGGATCGAGA     | AGTCACCGTCTTGCCATTCT     | <b>Setbp1</b>   | CGAAGCCATCCAATGCGAAG  | GCCCCGAGAGGTAAGTTGT     |
| <b>Mb</b>        | CCGGTCAAGTACCTGGAGTTTA   | AGCATCTGCTCCAAAGTCCC     | <b>Nr1d1</b>    | AAGACCTTACTGCTCGGTGC  | TGTAGGTGATAACACCACCTGT  |
| <b>Sln</b>       | GTCTTTGCTTCTCTTCAGGACGTG | GCAGCATCCCATGTCAACAG     | <b>Atp6v0a4</b> | AGTCTCGCCATGTCATTCT   | CATGTTGGCCAGCCTGTTC     |
| <b>RatNP-3b</b>  | CGCCAAAGTCTGAAACCACAG    | AGAGAAAGGTCTAGGACACAACAT | <b>Hbe1</b>     | TGGGAAGACTTCTCGTTGTGT | TGCCATGGGCTTTGACTCTT    |
| <b>Cxcl6</b>     | GGTCTGCTCGTCATTACC       | GCCGAGAAAGGAGCAGCTTG     | <b>Il10</b>     | TGCGACGCTGTCATCGATT   | GTAGATGCCGGGTGGTTCAA    |
| <b>Smpx</b>      | CAGCCACATGAAAAGCACTGG    | AGGTCTTATACCTGCTCTCTGG   | <b>Cer6</b>     | TTGAAGAGTCCAGCCCCAAG  | TTCATCGTTTCCAATAATGTCCG |
| <b>Nppa</b>      | TTTCAAGAACCTGCTAGACCACC  | GTTGACTTCCCCAGTCCAGG     | <b>Ccl2</b>     | TATGCAGGTCTCTGTACGC   | GGCATTAACTGCATCTGGCTG   |
| <b>Myoz2</b>     | GGCTCAGTCCCCTGTTGAG      | TTTTGTCCCTTGCTGTGAGA     | <b>Ccl19</b>    | TTCTCCAAGAGCAAAGGCG   | ACTCACGTTTACACCAGACTC   |
| <b>Pthlh</b>     | ACTGCATGACAAGGGCAAGT     | TGTTGGGAGCAGTTTGGAG      | <b>Cxcl13</b>   | CAGGCCACGGTATTCTGGAG  | CTTTTGGTAACCATCTGGCAGT  |
| <b>Tnfrsf13c</b> | CTGAGTGCTTCGACCCCTCTG    | CCAGGCTGCTTGTCATGTCTA    | <b>Cyp2b2</b>   | AGGACCATGGAGCCCAGTAT  | TCTCGAAGCTGCATGAAGGA    |
| <b>Tbx18</b>     | CCCAAAGCAAGGCAACAAA      | GTCAGCGGGAGCCATACTAC     | <b>Lyc2</b>     | GACTCAAGCTGAAGGGAAGGT | ACACATCCAGTTTCCAGGC     |
| <b>Nr1d2</b>     | CGGGACGCTGTTTCGATTGG     | CCGAAGTGGGTGCTCATCAT     | <b>Per3</b>     | CCGGAGAGGGGTAGAGACAC  | AGCGCCACTGAAACCAAAAC    |
| <b>Vsig4</b>     | TGAGGTGAGCAGGATGTATGC    | TCAGAGCCTGGGAATCTGGT     | <b>Cxadr</b>    | TCCTCCAAGAGTCCGACAT   | TACTTGAAGTTAGCGGGTGCC   |
| <b>Dbp</b>       | TTAGTGGCGGCTTGACCTCTA    | TTGTACCTCCGGCTCCAGTA     | <b>Slc4a1</b>   | ACTTCACAAAGGACCCCGA   | CTGTGGGAAGAGCTTCTGACTC  |
| <b>Krt75</b>     | TGGTCAGCTGTGGTCACTTC     | CGGCTGCTACTGGTGGTAAA     | <b>Tlr2</b>     | TGGAGGTCTCCAGGTCAAATC | TGTTTGCTGTGAGTCCCGAG    |
| <b>Gli3</b>      | CCCACACCCCTACATCAACC     | TGGGAAATCTGGTGTCTGCC     | <b>Tlr4</b>     | CGTTTCAGCTTTGCCTTCA   | CTCCAGAAGATGTGCCTCCC    |
